# Supplementary material
Source: Springer Nature journal article supplement (https://www.springermedizin.de/resource/supplementary/12885_2013_4232_MOESM5_ESM.pdf/9465826)
Supplement: MOESM5 [file 9465826]

**Figure S4**

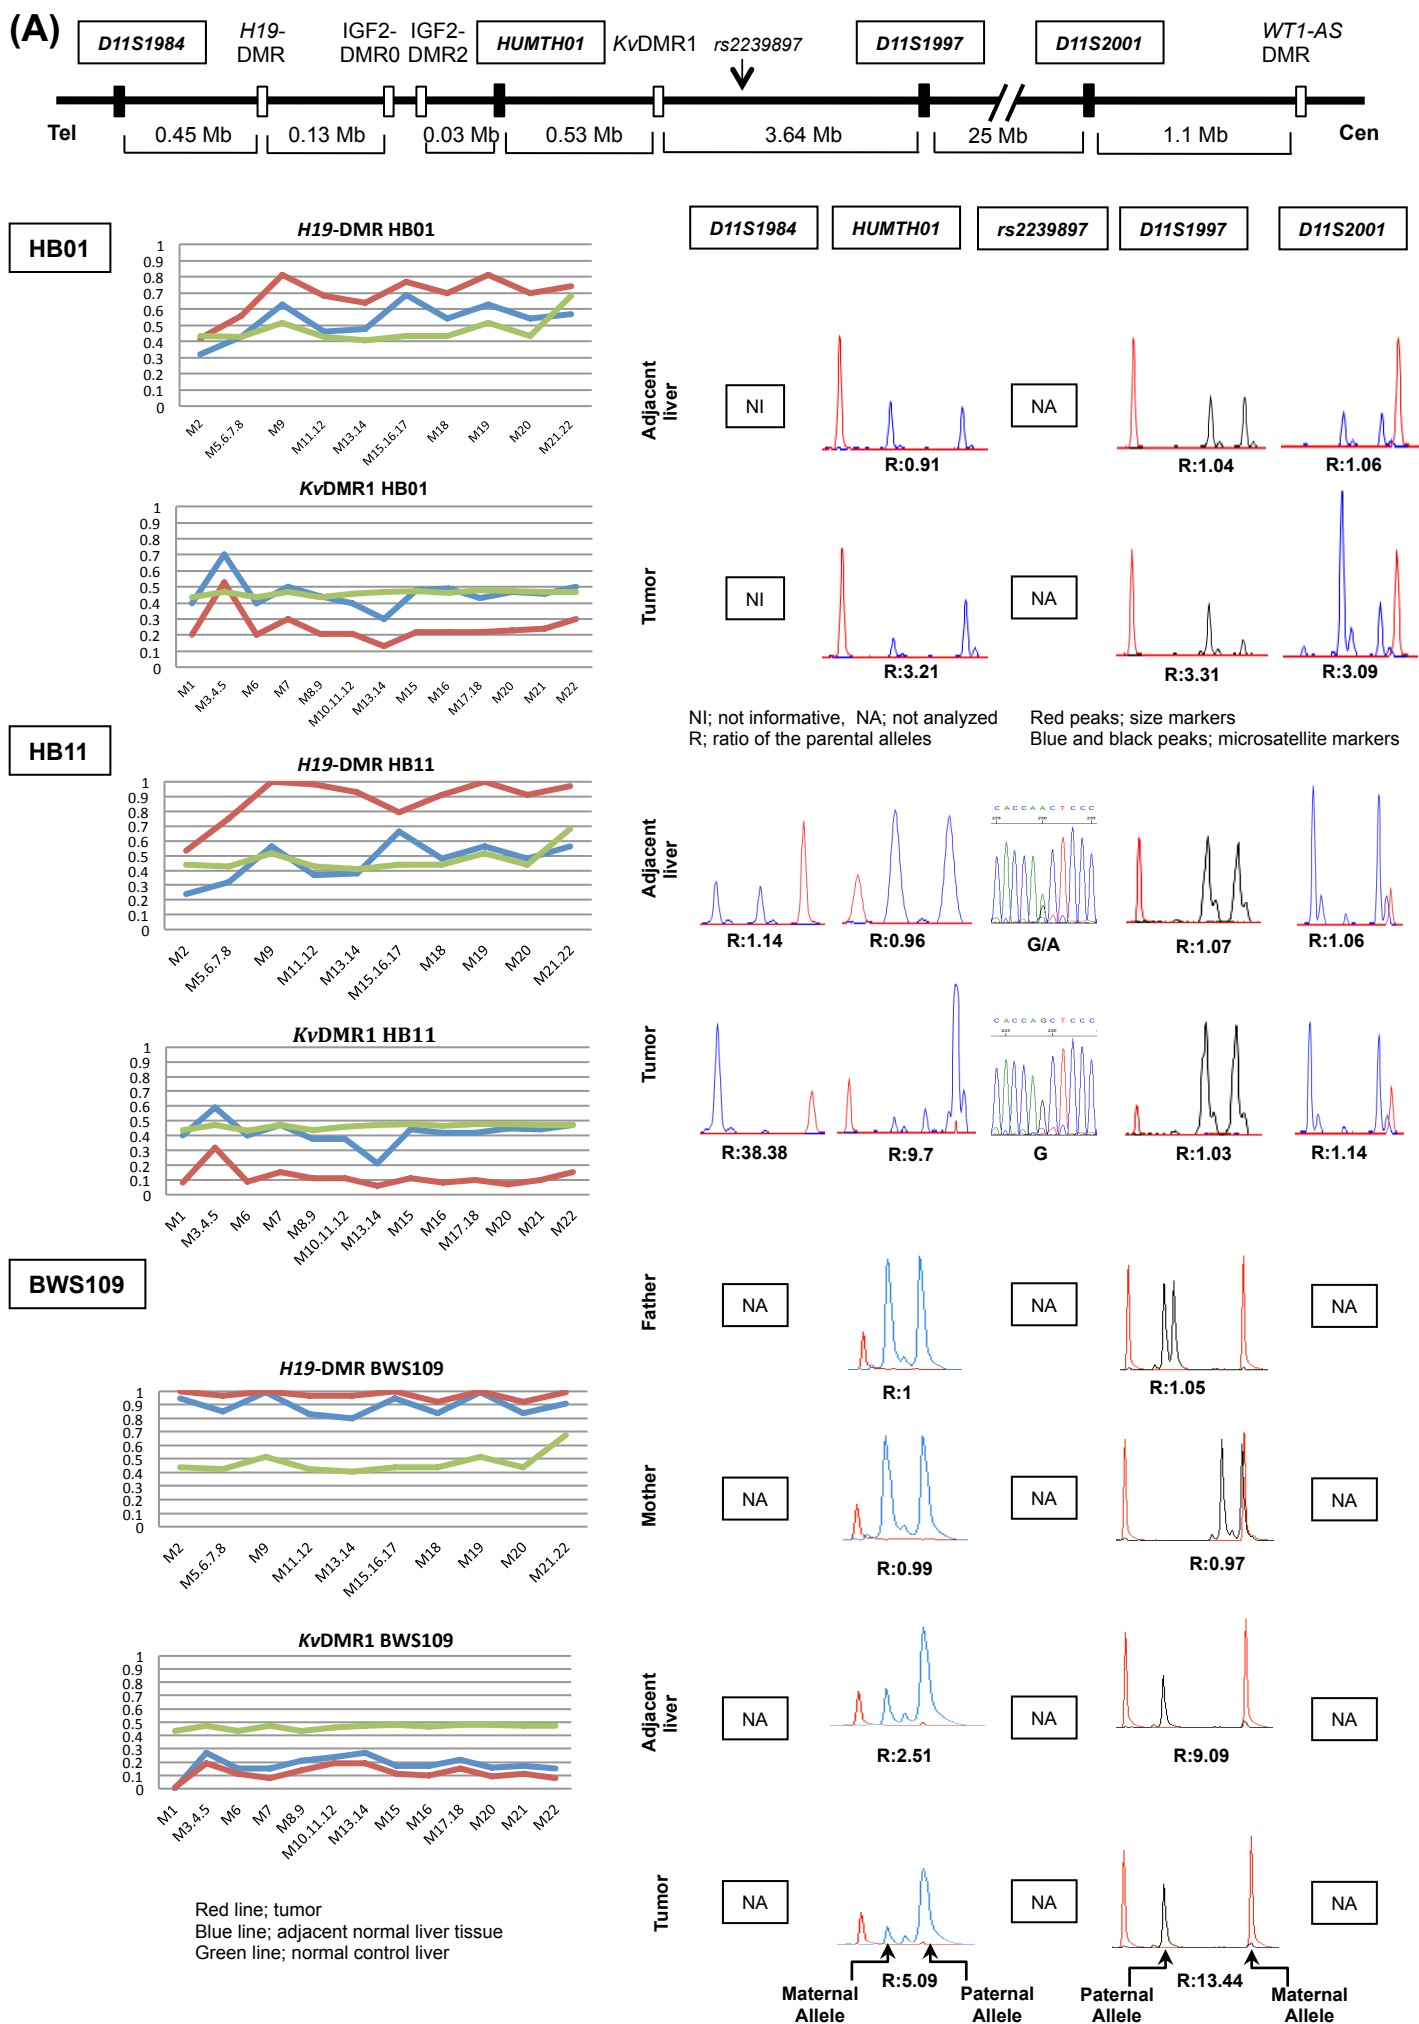

**(B)** **(C)**

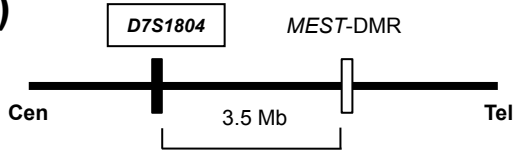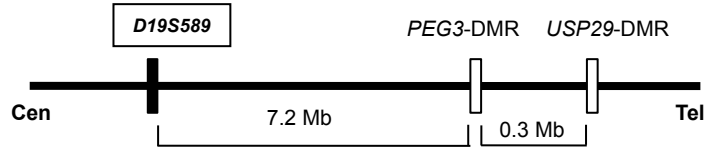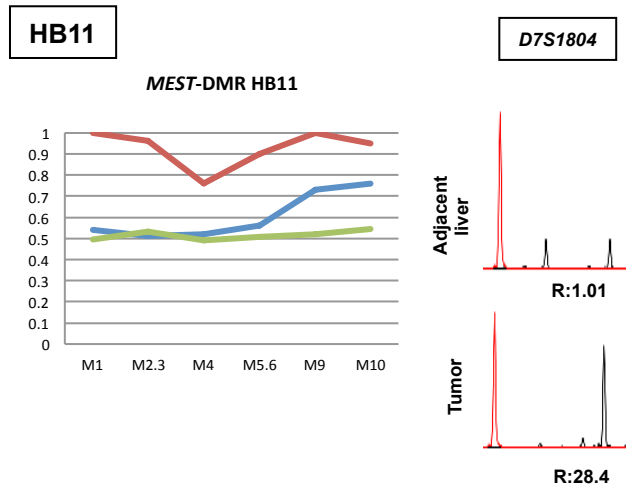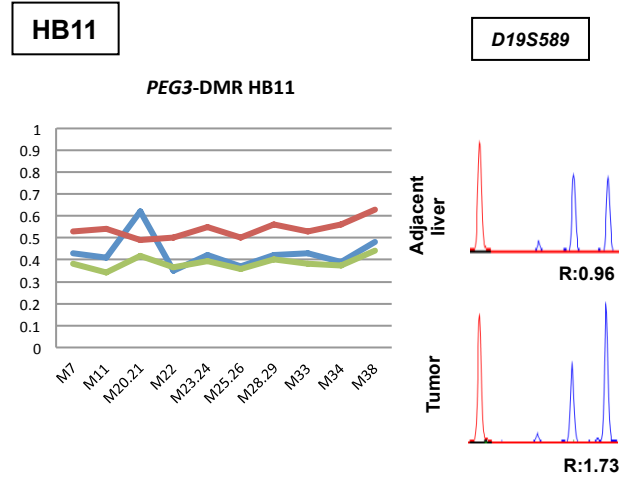

**(D)**

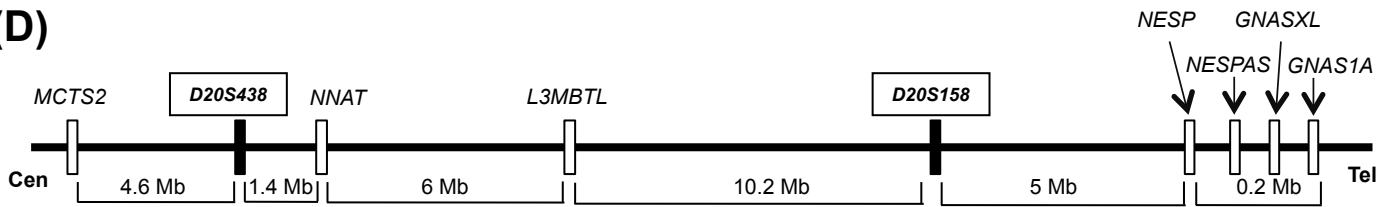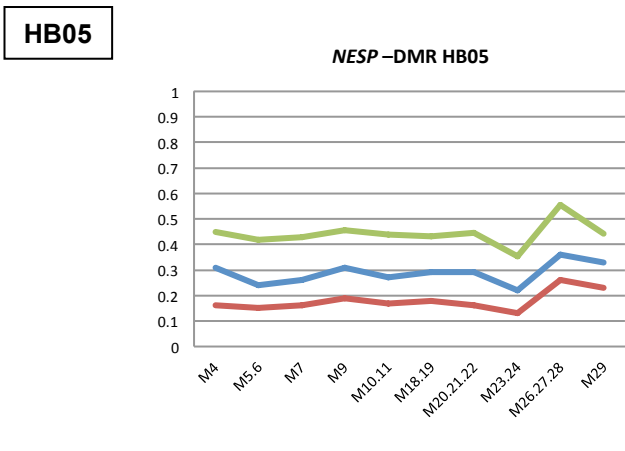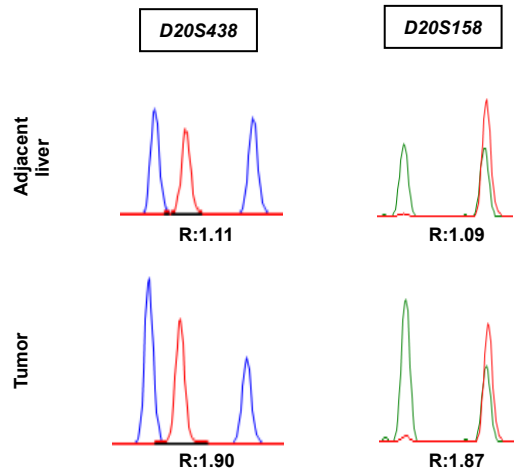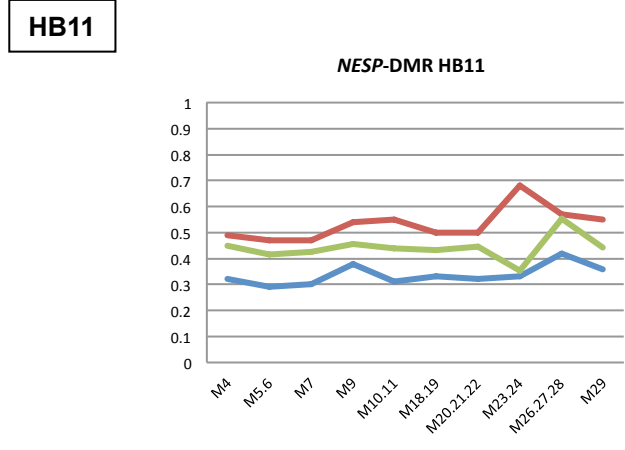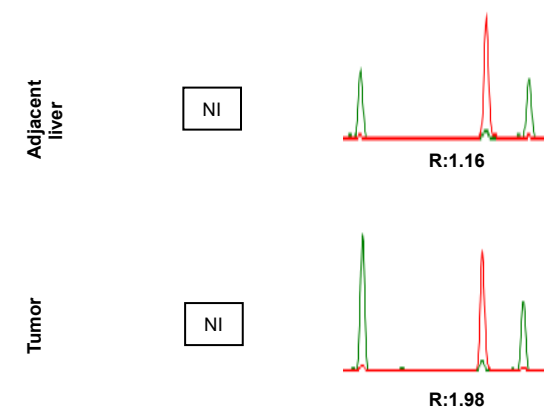

Red line; tumor  
Blue line; adjacent normal liver tissue  
Green line; normal control liver

Ni; not informative  
R; ratio of the parental alleles  
Red peaks; size markers  
Blue, green, and black peaks; microsatellite markers
